# Supplementary material
Source: publisher site journal article supplement (https://www.dovepress.com/article/509065)
Supplement: Supplementary file 1 [file get_supplementary_file.php]

**Supplement Tables**

**Table S1.** Multivariate logistic regression analysis of knowledge, attitude and practice dimensions.

|  | Factors | Multivariate logistic regression | |
| --- | --- | --- | --- |
|  | OR (95%CI) | P |
| Knowledge | **Residence** |  |  |
|  | Non-Urban | Ref. |  |
|  | Urban | 1.08 (0.62, 1.89) | 0.791 |
|  | **Education** |  |  |
|  | Primary School and below | Ref. |  |
|  | High School / Technical secondary school | 1.41 (0.73, 2.73) | 0.310 |
|  | Junior college and above | 2..87 (1.41, 5.88) | 0.004 |
|  | **Working status** |  |  |
|  | Other | Ref. |  |
|  | Employed | 1.00 (0.49, 2.05) | 0.994 |
|  | Unemployed | 1.19 (0.56, 2.53) | 0.656 |
|  | Retired | 0.93 (0.36, 2.39) | 0.880 |
|  | Self-employed | 1.62 (0.60, 4.34) | 0.339 |
|  | Housewife | 1.91 (0.89, 4.10) | 0.099 |
|  | **Monthly per capita income, yuan** |  |  |
|  | <2000 | Ref. |  |
|  | 2000-5000 | 1.53 (0.83, 2.80) | 0.172 |
|  | 5000-10000 | 1.27 (0.61, 2.62) | 0.523 |
|  | 10000-20000 | 1.82 (0.61, 5.39) | 0.281 |
|  | >20000 | 1.26 (0.34, 4.65) | 0.724 |
|  | **Patient’s department** |  |  |
|  | Oncology | Ref. |  |
|  | Chinese Medicine / Integrated Chinese and Western Medicine | 1.94 (1.17, 3.24) | 0.011 |
|  | **Does your family undergo Chinese medicine?** |  |  |
|  | Yes | Ref. |  |
|  | No | 0.78 (0.44, 1.39) | 0.402 |
|  | Unclear | 0.46 (0.21, 1.01) | 0.053 |
|  | **Do you have any knowledge of Chinese medicine?** |  |  |
|  | No | Ref. |  |
|  | Yes | 2.90 (1.76, 4.79) | <0.001 |
|  | **Relationship with the patient** |  |  |
|  | Parent | Ref. |  |
|  | Grandparent | 0.64 (0.19, 2.21) | 0.484 |
|  | Children | 0.22 (0.05, 1.02) | 0.052 |
|  | Spouse | 0.75 (0.45, 1.25) | 0.272 |
|  | Other | 0.44 (0.21, 0.90) | 0.025 |
| Attitude | **Knowledge score** |  |  |
|  | <75% | Ref. |  |
|  | ≥75% | 1.96 (1.23, 3.11) | 0.005 |
|  | **Type of cancer your family suffers from** |  |  |
|  | Other | Ref. |  |
|  | Lung cancer | 1.52 (0.85, 2.70) | 0.158 |
|  | Liver Cancer | 0.91 (0.27, 3.07) | 0.879 |
|  | Stomach Cancer | 1.62 (0.87, 3.03) | 0.129 |
|  | Bowel Cancer | 1.09 (0.53, 2.23) | 0.822 |
|  | Breast Cancer | 0.93 (0.34, 2.52) | 0.884 |
|  | Ovarian Cancer | 1.11 (0.33, 3.70) | 0.861 |
|  | Head and Neck Tumor | 1.55 (0.50, 4.77) | 0.443 |
|  | **Patient’s department** |  |  |
|  | Oncology | Ref. |  |
|  | Chinese Medicine / Integrated Chinese and Western Medicine | 2.10 (1.27, 3.47) | 0.004 |
|  | **Does your family undergo Chinese medicine?** |  |  |
|  | Yes | Ref. |  |
|  | No | 0.78 (0.44, 1.39) | 0.396 |
|  | Unclear | 1.37 (0.71, 2.63) | 0.350 |
|  | **Do you have any knowledge of Chinese medicine?** |  |  |
|  | No | Ref. |  |
|  | Yes | 0.99 (0.61, 1.60) | 0.966 |
| Practice | **Knowledge score** |  |  |
|  | <75% | Ref. |  |
|  | >=75% | 1.14 (0.70, 1.85) | 0.600 |
|  | **Attitude score** |  |  |
|  | <75% | Ref. |  |
|  | ≥75% | 5.65 (3.57, 8.93) | <0.001 |
|  | **Patient’s department** |  |  |
|  | Oncology | Ref. |  |
|  | Chinese Medicine / Integrated Chinese and Western Medicine | 1.13 (0.71, 1.80) | 0.605 |
|  | **Do you have any knowledge of Chinese medicine?** |  |  |
|  | No | Ref. |  |
|  | Yes | 1.44 (0.90, 2.29) | 0.125 |

OR: odds ratio; CI: confidence interval; ref.: reference category.
